# Supplementary material
Source: MDPI journal article supplement (https://www.mdpi.com/2073-4344/12/8/822)
Supplement: s1 [file s1]

Supporting Information

# Tungsten Trioxide and its TiO<sub>2</sub> Mixed Composites for the Photocatalytic Degradation of NO<sub>x</sub> and Bacteria (*Escherichia coli*) Inactivation

Ermelinda Falletta <sup>1</sup>, Claudia Letizia Bianchi <sup>1</sup>, Franca Morazzoni <sup>2,\*</sup>, Alessandra Polissi <sup>3</sup>, Flavia Di Vincenzo <sup>3</sup> and Ignazio Renato Bellobono <sup>4</sup>

<sup>1</sup> Dipartimento di Chimica, Università degli Studi di Milano, via Camillo Golgi 19, 20133 Milano, Italy; ermelinda.falletta@unimi.it (E.F.); claudia.bianchi@unimi.it (C.L.B.)

<sup>2</sup> Dipartimento di Scienza dei Materiali, Università di Milano-Bicocca, via Roberto Cozzi, 55, 20125 Milano, Italy

<sup>3</sup> Dipartimento di Scienze farmacologiche e Biomolecolari, Università degli Studi di Milano, via Giuseppe Balzaretto, 9, 20133 Milan, Italy; alessandra.polissi@unimi (A.P.); flavia.divincenzo@unimi.it (F.D.V.)

<sup>4</sup> Dipartimento di Fisica, Università degli Studi di Milano, via Giovanni Celoria, 16, 20133 Milano, Italy; i.r.bellobono@alice.it

\* Correspondence: franca.morazzoni@unimib.it

**Table S1.** The EDS analysis.

| Sample                                 | Ti (mass %) | W (mass %) | TiO <sub>2</sub> (mass %) | WO <sub>3</sub> (mass %) |
|----------------------------------------|-------------|------------|---------------------------|--------------------------|
| WO <sub>3</sub> @TiO <sub>2</sub> _20  | 68.63       | 31.38      | 74.30                     | 25.70                    |
| WO <sub>3</sub> @TiO <sub>2</sub> _20* | 96.50       | 3.50       | 97.33                     | 2.67                     |

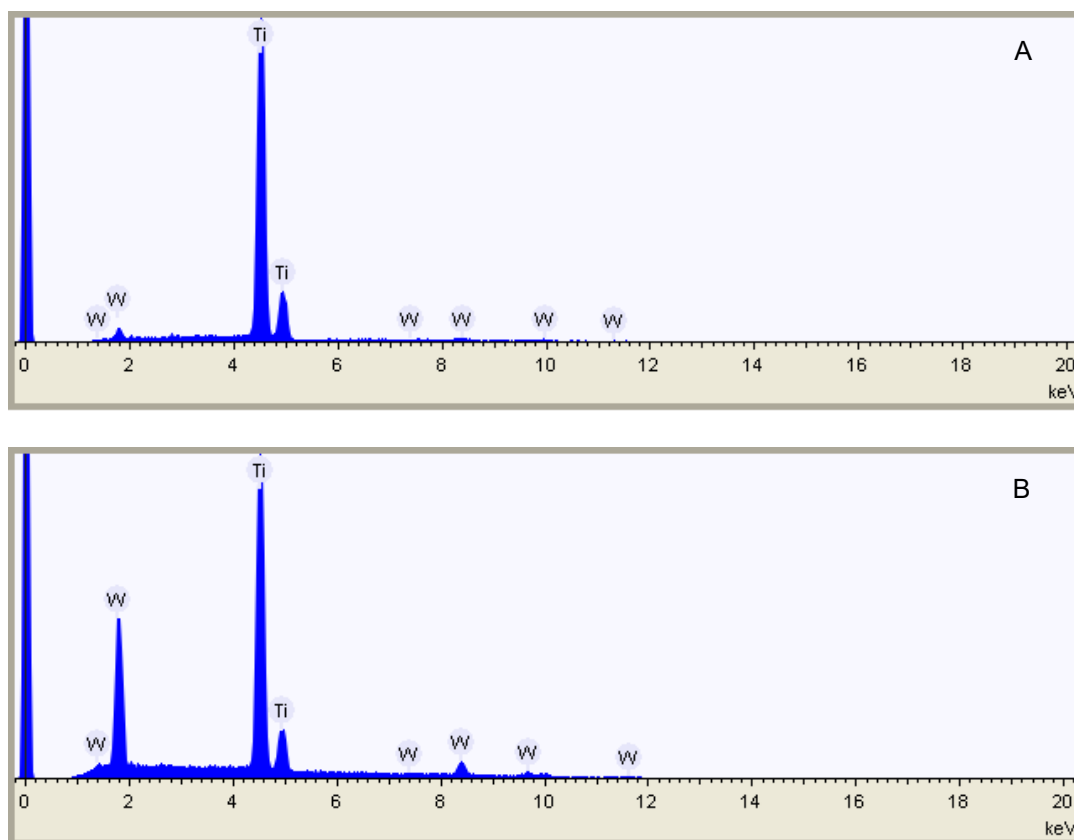

**Figure S1.** EDX spectrum of (A) WO<sub>3</sub>@TiO<sub>2</sub>\_20\* and (B) WO<sub>3</sub>@TiO<sub>2</sub>\_20.

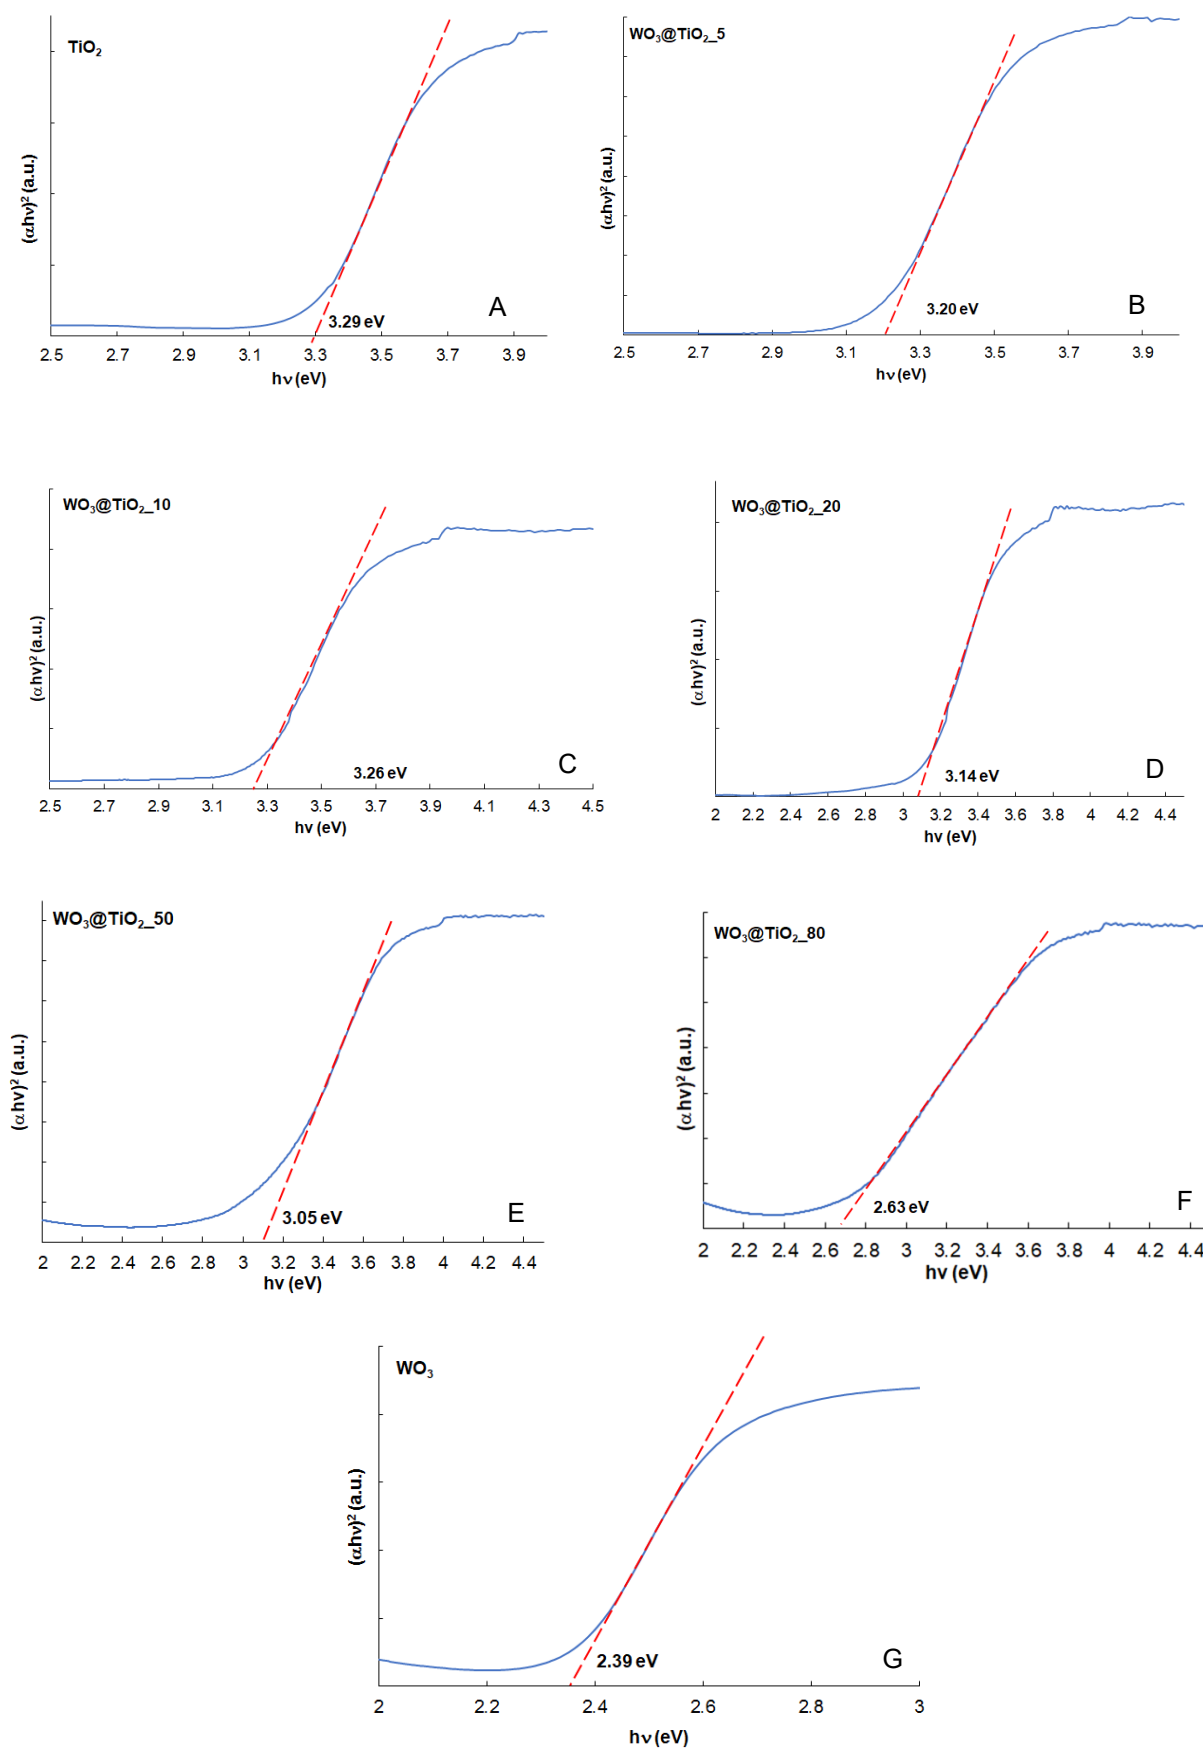

**Figure S2.** Tauc plot of  $\text{TiO}_2$  (A),  $\text{WO}_3/\text{TiO}_2_{5}$  (B),  $\text{WO}_3/\text{TiO}_2_{10}$  (C),  $\text{WO}_3/\text{TiO}_2_{20}$  (D),  $\text{WO}_3/\text{TiO}_2_{50}$  (E),  $\text{WO}_3/\text{TiO}_2_{80}$  (F),  $\text{WO}_3$  (G).

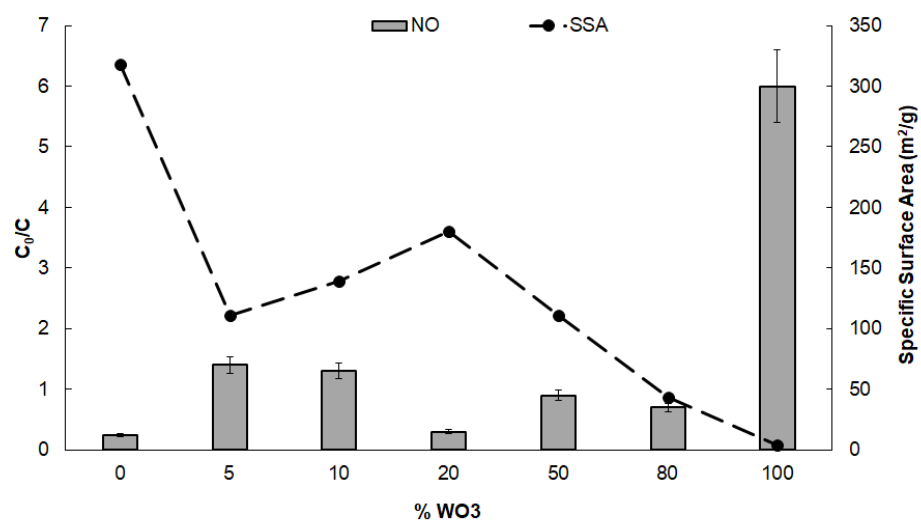

**Figure S3.** Dependence of  $\text{WO}_3$  content (%) in the composites versus and NO production.
